# Supplementary material for: Effect of l-arabinose and lactulose combined with Lactobacillus plantarum on obesity induced by a high-fat diet in mice
Source: Royal Society of Chemistry journal article supplement (doi:10.1039/d4fo00369a), 2024-01-01
Supplement: d4fo00369a1.pdf [file d4fo00369a1.pdf]

Table S1 normal diet(TP23302) and high-fat diet(TP23300) components

| Material                                    | TP23300 | TP23302 |
|---------------------------------------------|---------|---------|
| Protein(casein, L-cystine)                  | 276     | —       |
| Protein(casein, L-cystine)                  | —       | 194     |
| Carbohydrate (dextrin, sucrose)             | 250     | —       |
| Carbohydrate(dextrin, sucrose, corn starch) | —       | 673     |
| Fat (soybean oil, lard)                     | 341     | —       |
| Fat (soybean oil, lard)                     |         | 40      |
| Fiber (Cellulose)                           | 68      | 48      |
| Mineral and vitamin mixture                 | 65      | 45      |
| Antioxidant (TBHQ)                          | 0.07    | 0.01    |
| Total                                       | 1000    | 1000    |
| Energy, kcal/g                              | 5.1     | 3.6     |
| % kcal from Protein                         | 19%     | 19%     |
| Carbohydrate                                | 21%     | 71%     |
| Fat                                         | 60%     | 10%     |
